# Supplementary material for: Plasma metabolomics reveals disrupted response and recovery following maximal exercise in myalgic encephalomyelitis/chronic fatigue syndrome
Source: JCI journal article supplement (doi:10.1172/jci.insight.157621), 2022-03-31
Supplement: sd1 [file 1]

# Supplementary Material

Germain et al. 2022

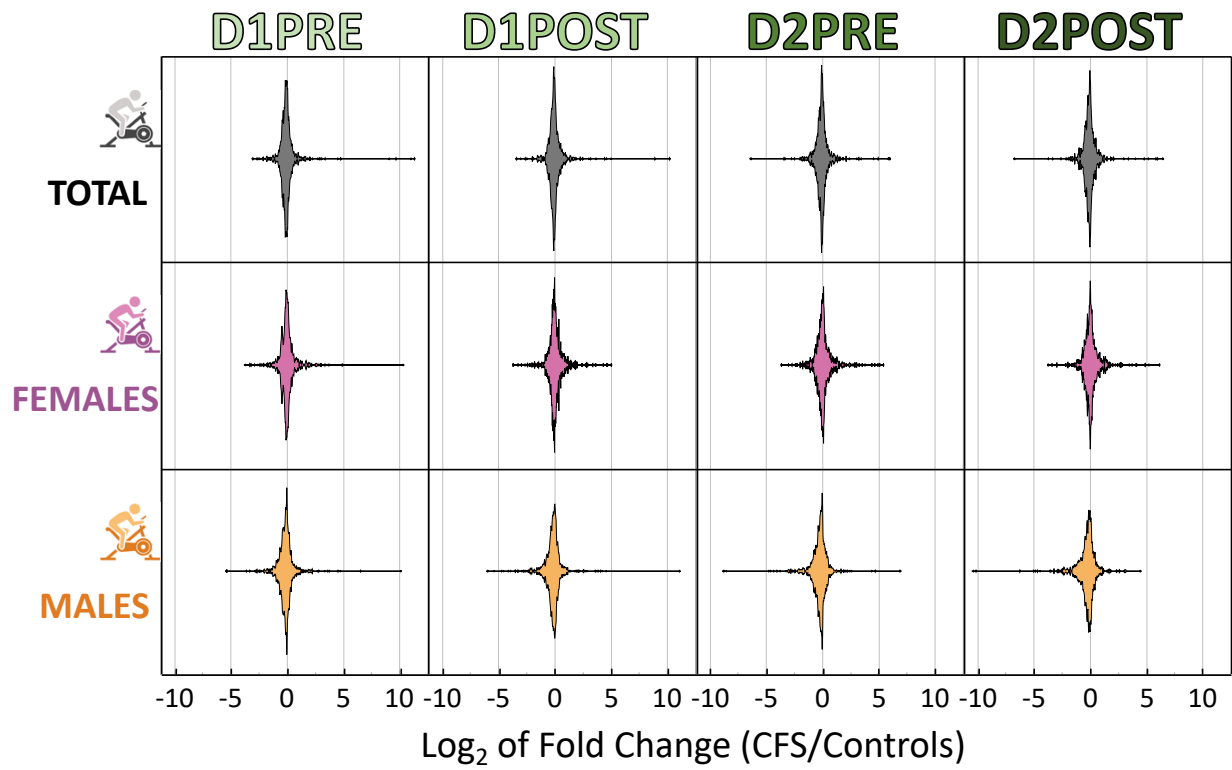

**Supplementary Figure 1:** Violin plots of the log<sub>2</sub>FC distribution for each timepoint and each cohort.

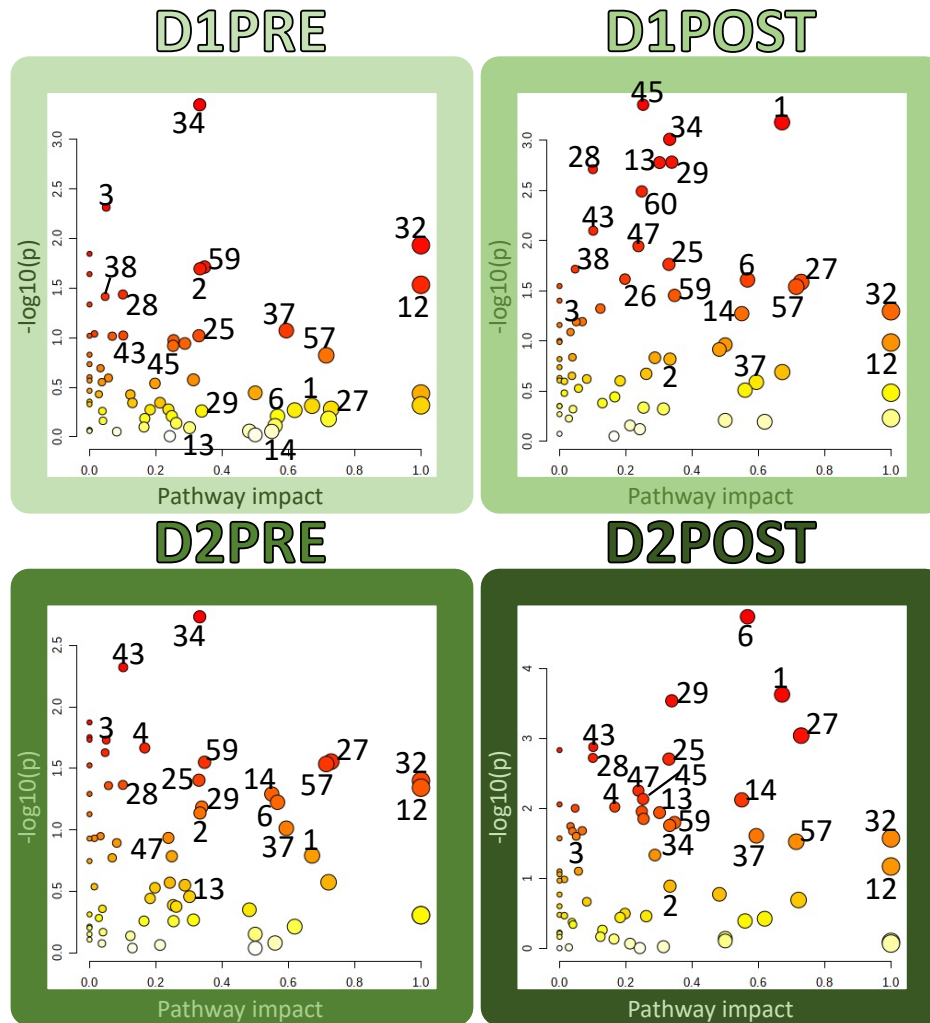

**Supplementary Figure 2:** Pathway analysis results from MetaboAnalyst at each timepoint for the female cohort. The pathway impact on the y-axis from 0 (low impact) to 1 (strong impact), represents the values from the pathway topology analysis. Each circle denotes a pathway, and the fill-in color represents the significance of disturbances in that pathway from white (low significance) to red (higher significance). The pathway numbers are as follows: #1 “Alanine, aspartate and glutamate metabolism”; #2 “alpha-Linolenic acid metabolism”; #3 “Amino sugar and nucleotide sugar metabolism”; #4 “Aminoacyl-tRNA metabolism”; #6 “Arginine and proline metabolism”; #12 “Caffeine metabolism”; #13 “Citrate cycle (TCA cycle)”; #14 “Cysteine and methionine metabolism”; #25 “Glycerolipid metabolism”; #26 Glycerophospholipid metabolism”; #27 “Glycine, serine and threonine metabolism”; #28 Glycolysis/Gluconeogenesis”; #29 “Glyoxylate and dicarboxylate metabolism”; #32 “Linoleic acid metabolism”; #34 “Nicotinate and nicotinamide metabolism”; #37 “Pentose and glucuronate interconversions”; #38 “Pentose phosphate pathway”; #43 “Primary bile acid biosynthesis”; #45 “Purine metabolism”; #47 “Pyruvate metabolism”; #57 “Taurine and hypotaurine metabolism”; #59 “Tryptophan metabolism”; #60 “Tyrosine metabolism”.

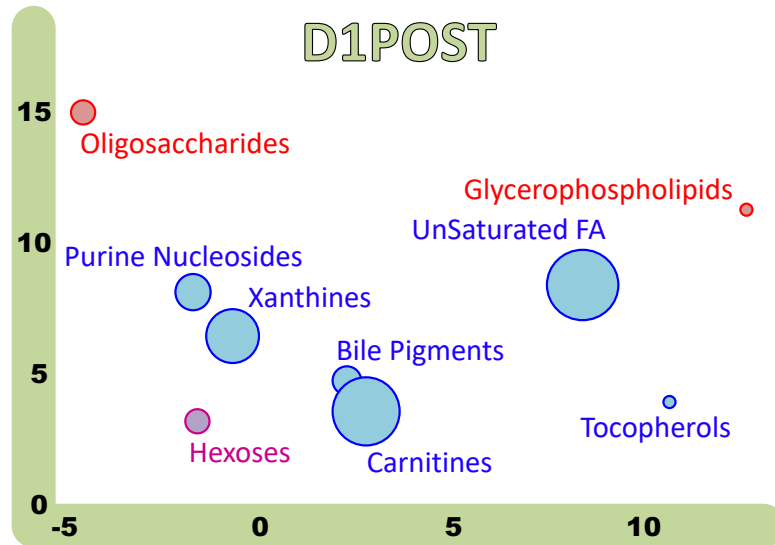

**Supplementary Figure 3:** ChemRICH output for D1POST for the female cohort. Only clusters enriched at  $p < 0.05$  are shown. The x-axis is the cluster order on the similarity tree. The y-axis is the  $-\log(p\text{-value})$ , with the most significantly altered clusters at the top. The color scale represents the portion of metabolites with a ratio of patients/controls either decreased (in blue), increased (in red) or an equal number of metabolites both increased and decreased (in purple).

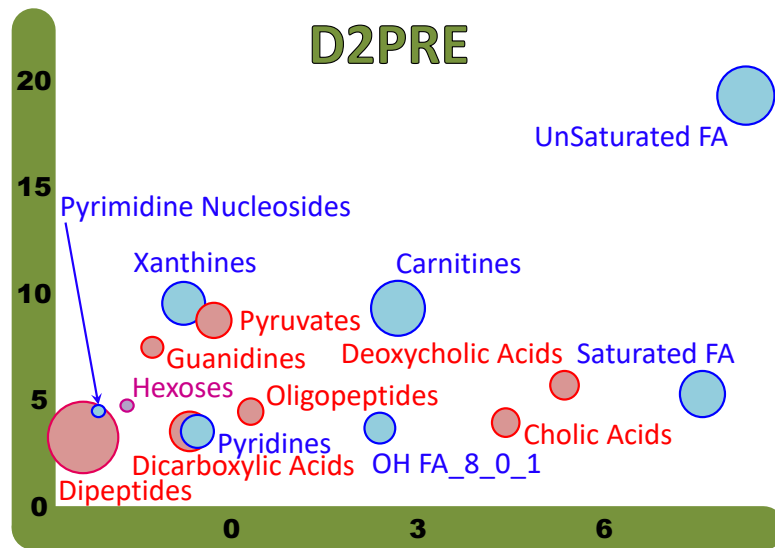

**Supplementary Figure 4:** ChemRICH output for D2PRE for the female cohort. Only clusters enriched at  $p < 0.05$  are shown. The x-axis is the cluster order on the similarity tree. The y-axis is the  $-\log(p\text{-value})$ , with the most significantly altered clusters at the top. The color scale represents the portion of metabolites with a ratio of patients/controls either decreased (in blue), increased (in red) or an equal number of metabolites both increased and decreased (in purple).

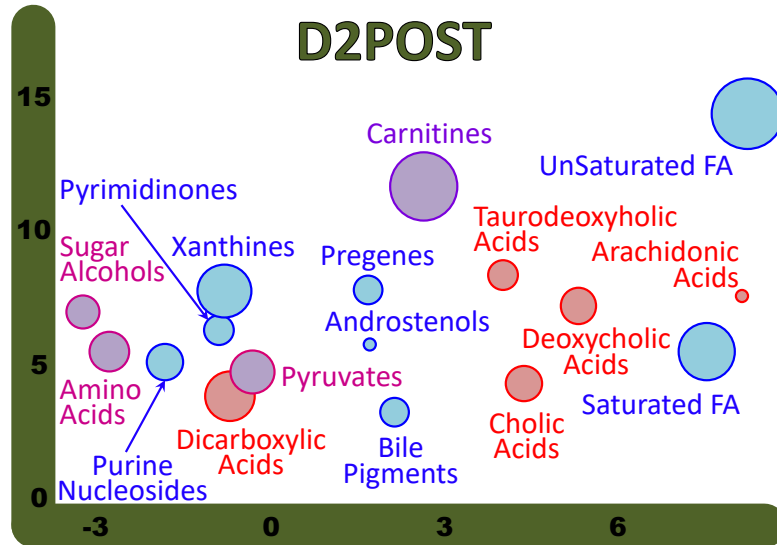

**Supplementary Figure 5:** ChemRICH output for D2POST for the female cohort. Only clusters enriched at  $p < 0.05$  are shown. The x-axis is the cluster order on the similarity tree. The y-axis is the  $-\log(p\text{-value})$ , with the most significantly altered clusters at the top. The color scale represents the portion of metabolites with a ratio of patients/controls either decreased (in blue), increased (in red) or an equal number of metabolites both increased and decreased (in purple).

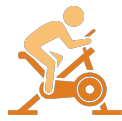

# MALES

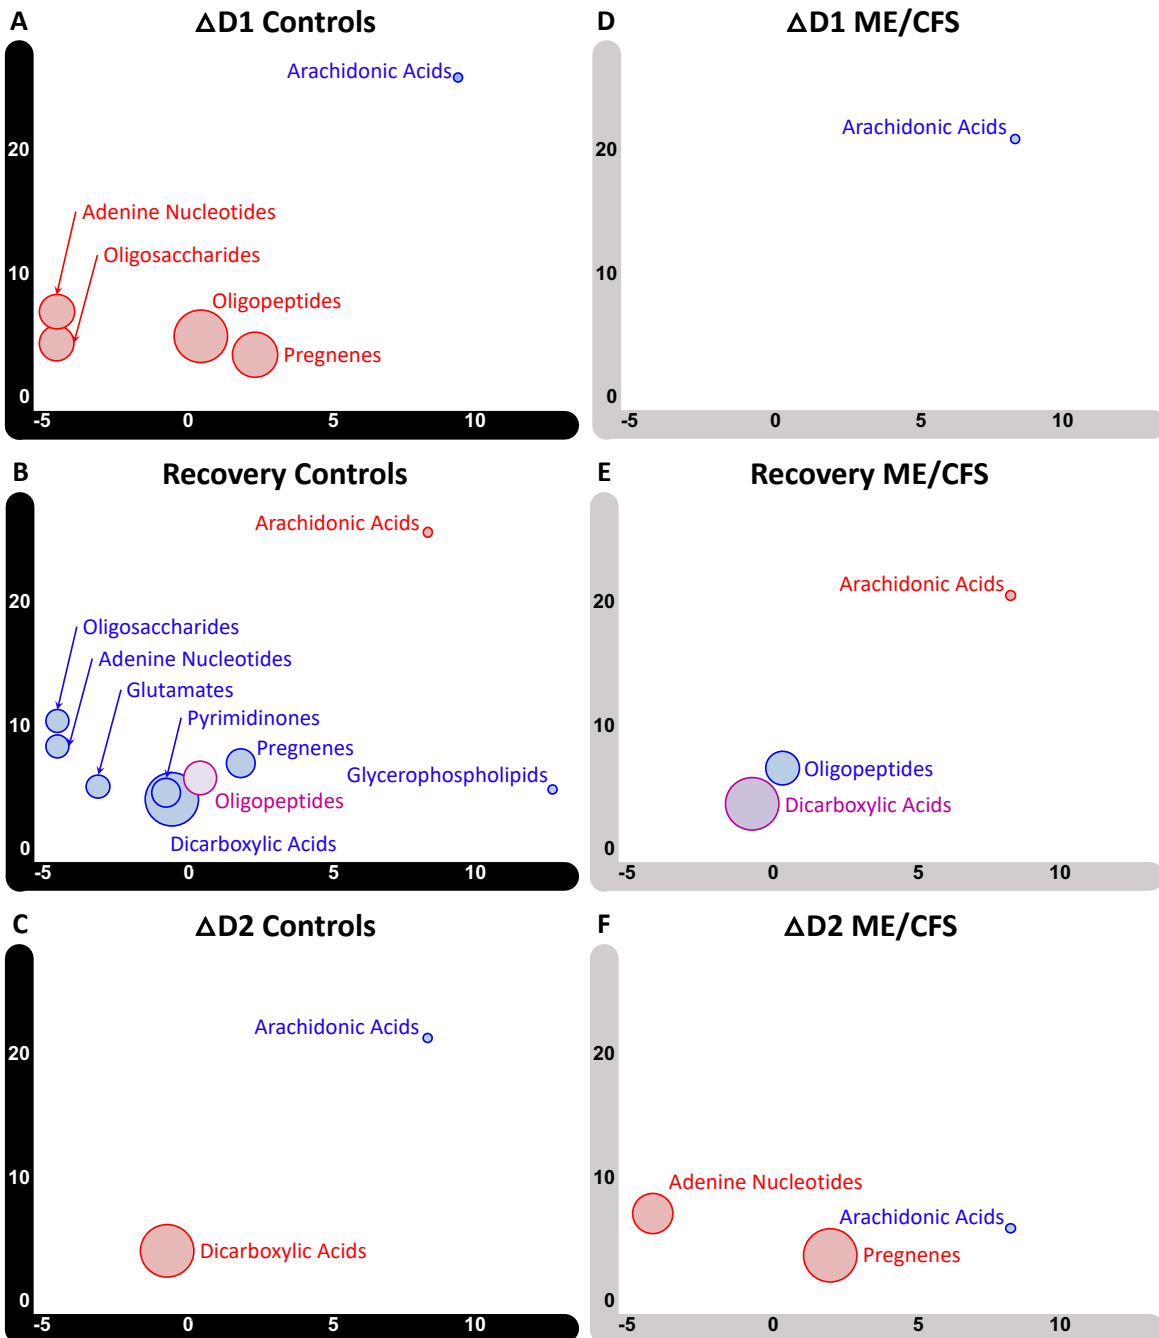

**Supplementary Figure 6:** ChemRICH output of  $\Delta D1$ , the 24-hour recovery period, and  $\Delta D2$  for male controls and ME/CFS patients. Only clusters enriched at  $p < 0.05$  are shown. The x-axis is the cluster order on the similarity tree. The y-axis is the  $-\log(p\text{-value})$ , with the most significantly altered clusters at the top. The color scale represents the portion of metabolites with a ratio of patients/controls either decreased (in blue) increased (in red) or an equal number of metabolites both increased and decreased (in purple).

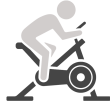

# TOTAL

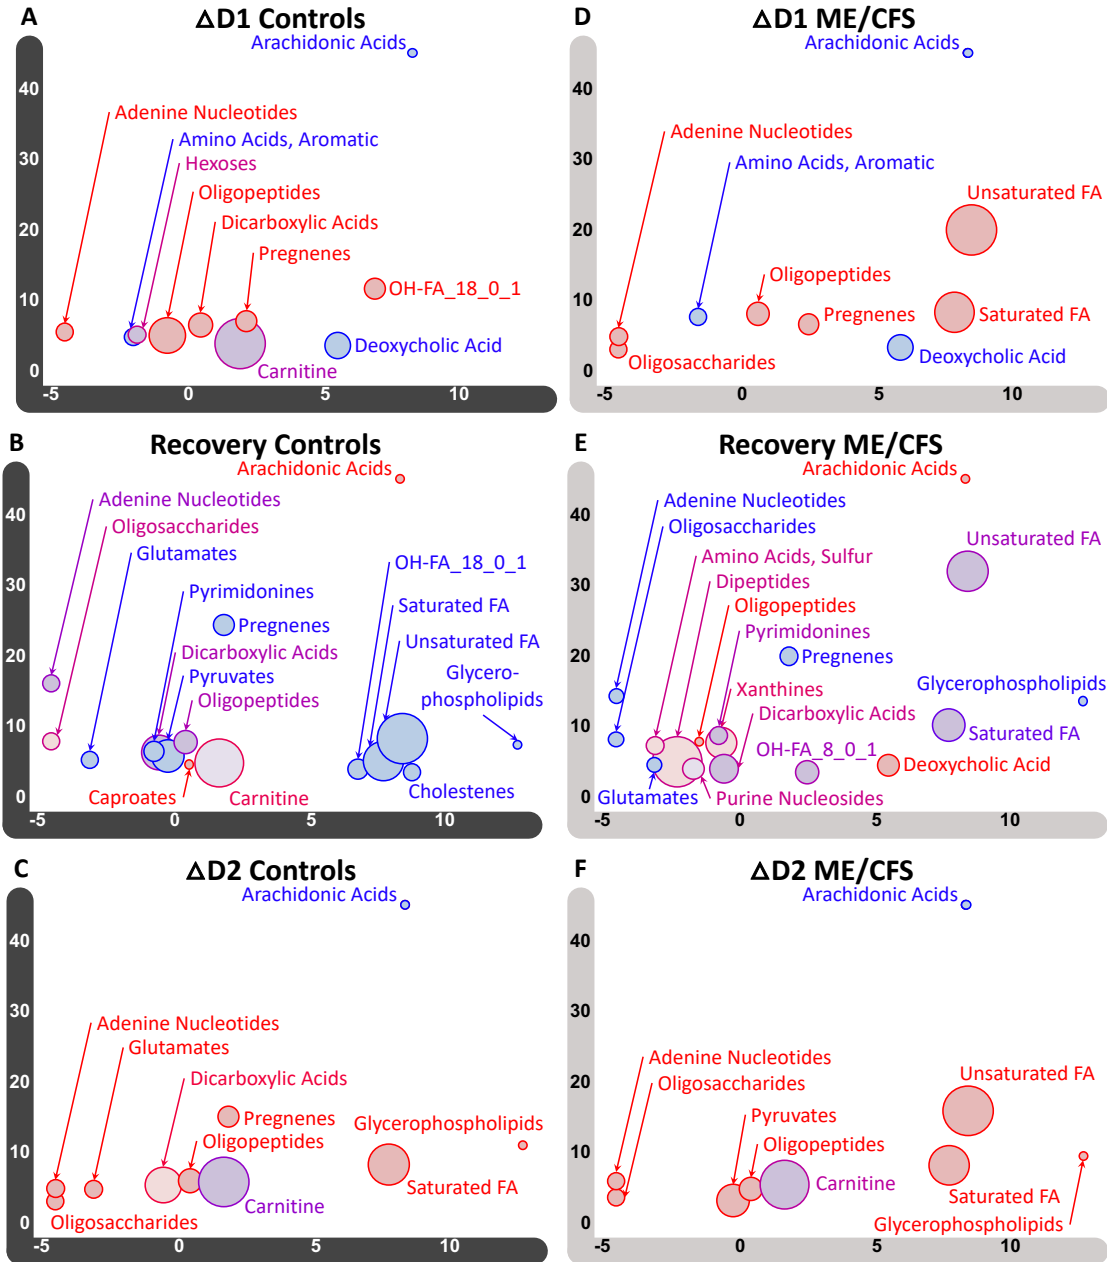

**Supplementary Figure 7:** ChemRICH output of  $\Delta D1$ , the 24-hour recovery period, and  $\Delta D2$  for all controls and ME/CFS patients. Only clusters enriched at  $p < 0.05$  are shown. The x-axis is the cluster order on the similarity tree. The y-axis is the  $-\log(p\text{-value})$ , with the most significantly altered clusters at the top. The color scale represents the portion of metabolites with a ratio of patients/controls either decreased (in blue) increased (in red) or an equal number of metabolites both increased and decreased (in purple).

**Supplementary Table 1.** Details of the population statistics without sex segregation.

|                                 |                                           | Controls<br>n = 45 | ME/CFS<br>n = 60 |
|---------------------------------|-------------------------------------------|--------------------|------------------|
| <b>Sex (n)</b>                  | Female                                    | 30                 | 45               |
|                                 | Male                                      | 15                 | 15               |
| <b>Ethnicity</b>                | Hispanic or Latino                        | 13%                | 17%              |
|                                 | Not Hispanic or Latino                    | 82%                | 78%              |
|                                 | ND                                        | 4%                 | 5%               |
| <b>Race</b>                     | American Indian or Alaska native          | 2%                 | 0                |
|                                 | Asian                                     | 11%                | 5%               |
|                                 | Black or African American                 | 4%                 | 0                |
|                                 | Native Hawaiian or other Pacific Islander | 0                  | 2%               |
|                                 | White                                     | 76%                | 88%              |
|                                 | ND                                        | 7%                 | 5%               |
| <b>Age</b>                      | Mean +/- SD                               | 42.6 +/- 13.5      | 46.7 +/- 11.5    |
|                                 | Median (min-max)                          | 44 (18-66)         | 48.5 (21-69)     |
| <b>BMI</b>                      | Mean +/- SD                               | 28.2 +/- 5.4       | 26 +/- 5.3       |
|                                 | Median (min-max)                          | 26.8 (20.6-41.8)   | 25.9 (18.5-39.1) |
| <b>Illness duration (years)</b> | Mean +/- SD                               | NA                 | 11.7 +/- 9.8     |
|                                 | Median (min-max)                          |                    | 8 (1-38)         |
| <b>Type of onset</b>            | Gradual                                   |                    | 43%              |
|                                 | Sudden                                    | NA                 | 55%              |
|                                 | ND                                        |                    | 2%               |
| <b>Bell's disability scale*</b> | 10-20                                     | 0                  | 15               |
|                                 | 30-40                                     | 0                  | 36               |
|                                 | 50-60                                     | 1                  | 8                |
|                                 | 70-80                                     | 2                  | 1                |
|                                 | 90-100                                    | 42                 | 0                |
| <b>SF-36*</b>                   | Physical Component Summary ( <b>PCS</b> ) | 55.9 +/- 4.6       | 28.2 +/- 7.2     |
|                                 | Mental Component Summary ( <b>MCS</b> )   | 55.1 +/- 5.1       | 44.2 +/- 10.2    |

\* Higher scores represent better health.

NA: Not applicable.

ND: Not determined.



**Supplementary Table 2.** Details of the population statistics with sex segregation.

|                                 |                                           | Controls (n = 45) |               | ME/CFS (n = 60) |               |
|---------------------------------|-------------------------------------------|-------------------|---------------|-----------------|---------------|
|                                 |                                           | Female            | Male          | Female          | Male          |
| <b>Sex (n)</b>                  |                                           | 30                | 15            | 45              | 15            |
| <b>Ethnicity</b>                | Hispanic or Latino                        | 17%               | 7%            | 13%             | 27%           |
|                                 | Not Hispanic or Latino                    | 80%               | 87%           | 80%             | 73%           |
|                                 | ND                                        | 3%                | 7%            | 7%              | 0             |
| <b>Race</b>                     | American Indian or Alaska native          | 3%                | 0             | 0               | 0             |
|                                 | Asian                                     | 10%               | 13%           | 7%              | 0             |
|                                 | Black or African American                 | 3%                | 7%            | 0               | 0             |
|                                 | Native Hawaiian or other Pacific Islander | 0                 | 0             | 2%              | 0             |
|                                 | White                                     | 73%               | 80%           | 89%             | 87%           |
|                                 | ND                                        | 10%               | 0             | 2%              | 13%           |
|                                 | <b>Age</b>                                | Mean +/- SD       | 42.1 +/- 14.5 | 43.5 +/- 11.8   | 47.4 +/- 11.8 |
| Median (min-max)                |                                           | 43 (18-66)        | 46 (24-64)    | 50 (21-69)      | 47 (23-58)    |
| <b>BMI</b>                      | Mean +/- SD                               | 28.8 +/- 5.8      | 26.9 +/- 4.6  | 25.2 +/- 5.4    | 28.2 +/- 4.6  |
|                                 | Median                                    | 27.4              | 25.8          | 24.4            | 26.8          |
|                                 | (min-max)                                 | (20.6-41.8)       | (21.4-37.5)   | (18.5-39.1)     | (19.8-38.4)   |
| <b>Illness duration (years)</b> | Mean +/- SD                               | NA                | NA            | 11.2 +/- 9.6    | 13.3 +/- 10.6 |
|                                 | Median (min-max)                          |                   |               | 7 (1-38)        | 10 (1-36)     |
| <b>Type of onset</b>            | Gradual                                   |                   |               | 42%             |               |
|                                 | Sudden                                    | NA                | NA            | 56%             |               |
|                                 | ND                                        |                   |               | 2%              |               |
| <b>Bell's disability scale*</b> | 10-20                                     | 0                 | 0             | 11              | 4             |
|                                 | 30-40                                     | 0                 | 0             | 28              | 8             |
|                                 | 50-60                                     | 1                 | 0             | 6               | 2             |
|                                 | 70-80                                     | 2                 | 0             | 0               | 1             |
|                                 | 90-100                                    | 27                | 15            | 0               | 0             |
| <b>SF-36*</b>                   | Physical Component Summary (PCS)          | 55.8 +/- 4.3      | 56.3 +/- 5.2  | 27.9 +/- 6.8    | 28.8 +/- 8.6  |
|                                 | Mental Component Summary (MCS)            | 54.7 +/- 5.6      | 55.8 +/- 4.1  | 44.1 +/- 10.9   | 44.5 +/- 8.1  |

\* Higher scores represent better health.

NA: Not applicable.

ND: Not determined.

**Supplementary Table 3.** Percentages of unknown metabolites for each timepoint and each cohort. Percentages in bold highlight an enrichment of unknowns compared to the percentages of unknowns in the dataset (20%). The information in parenthesis is also visually depicted in Figure 3 as the bars within the histogram bars.

|               | <b><i>q</i> &lt; 0.05</b> |                       |              | <b><i>q</i> &lt; 0.15</b> |                        |              | <b><i>p</i> &lt; 0.05</b> |                        |                       |
|---------------|---------------------------|-----------------------|--------------|---------------------------|------------------------|--------------|---------------------------|------------------------|-----------------------|
|               | <b>TOTAL</b>              | <b>FEMALES</b>        | <b>MALES</b> | <b>TOTAL</b>              | <b>FEMALES</b>         | <b>MALES</b> | <b>TOTAL</b>              | <b>FEMALES</b>         | <b>MALES</b>          |
| <b>D1PRE</b>  | <b>45%</b><br>(9/20)      | <b>43%</b><br>(3/7)   | -            | <b>23%</b><br>(13/56)     | <b>22%</b><br>(16/72)  | -            | 17%<br>(33/194)           | 19%<br>(33/174)        | <b>23%</b><br>(11/48) |
| <b>D1POST</b> | 18%<br>(6/34)             | <b>38%</b><br>(9/24)  | -            | 15%<br>(13/88)            | <b>29%</b><br>(16/55)  | -            | 16%<br>(32/202)           | <b>22%</b><br>(41/185) | <b>24%</b><br>(11/45) |
| <b>D2PRE</b>  | 14%<br>(8/56)             | <b>27%</b><br>(8/30)  | -            | 18%<br>(18/102)           | <b>21%</b><br>(23/109) | -            | 19%<br>(41/211)           | 19%<br>(41/211)        | <b>24%</b><br>(19/78) |
| <b>D2POST</b> | 17%<br>(12/69)            | <b>25%</b><br>(14/56) | -            | 15%<br>(23/152)           | <b>20%</b><br>(28/143) | -            | 15%<br>(36/246)           | <b>21%</b><br>(49/234) | <b>28%</b><br>(20/72) |
